# Supplementary material for: Prognostic Impact and Risk Factors of Infections in Patients with Chronic Lymphocytic Leukemia Treated with Ibrutinib
Source: MDPI journal article supplement (doi:10.3390/cancers13133240), 2021-06-29
Supplement: s1 [file s1]

## Supplementary Material

**Table S1.** Infections recorded in patients treated with ibrutinib ± rituximab.

| Total number of infectious events<br>[number of lethal infections] | 156 (29) |
|--------------------------------------------------------------------|----------|
| Pneumonia <sup>(1)</sup>                                           | 126 (17) |
| Grade ≥ 3 non opportunistic infections                             | 40 (3)   |
| Sepsis <sup>(2)</sup>                                              | 7 (2)    |
| Other non opportunistic infections <sup>(3)</sup>                  | 26 (0)   |
| Viral infections <sup>(4)</sup>                                    | 7 (1)    |
| Grade ≥ 3 opportunistic infections OI                              | 25 (9)   |
| Fungal infections                                                  | 14 (7)   |
| • <i>Aspergillus</i> <sup>(5)</sup>                                | 11 (6)   |
| • <i>Cryptococcus</i> <sup>(6)</sup>                               | 2 (1)    |
| • <i>Pneumocystis jirovecii</i> (PJ)                               | 1 (0)    |
| Mycobacterium tuberculosis                                         | 2 (0)    |
| CMV infection <sup>(7)</sup>                                       | 3 (1)    |
| Disseminated HVZ                                                   | 5 (0)    |
| PML                                                                | 1(1)     |

Abbreviations: IR, incidence rate; IBR±R, ibrutinib+rituximab; CMV, cytomegalovirus, HVZ, herpes varicella zoster; PML, Progressive multifocal leukoencephalopathy. <sup>(1)</sup> Pneumonia etiology: pneumococcus, 3 cases; pseudomonas, 2; cytotbacter Kyusei, 1; actinomyces, 1; not specified Gam+ agent, 1; not specified Gam-, agent, 1; not specified, 117. <sup>(2)</sup>Sepsis: *E. Coli*, 3 cases; *Klebsiella*, 1; *Staphylococcus aureus*, 1; not specified, 2. <sup>(3)</sup>Other infections: soft tissues infections, 5; gastroenteric, 6; urogenital, 7; upper respiratory tract infections, 8. <sup>(4)</sup>Viral infections: *H1N1* influenza, 1 case; reactivation of HBV hepatitis, 3 HBc positive patients; Covid-19 pneumonia, 2; EBV infection, 1. <sup>(5)</sup> *Aspergillus* infections: pneumonia, 7 cases; sepsis, 3; pneumonia and cerebral involvement, 3, spondilodiscitis, 1. <sup>(6)</sup> *Cryptococcus* infection: pneumonia, 1 case; meningitis, 1. <sup>(7)</sup> CMV infection: CMV gastroenteritis, 1 case; CMV interstitial pneumonia, 2.

**Table S2.** Events leading to permanent treatment discontinuation in 2% of patients treated with ibrutinib ± rituximab.

|                                                      | <i>n</i> = 494 (100%) |
|------------------------------------------------------|-----------------------|
| No patients with permanent treatment discontinuation | 236 (48)              |
| Disease progression                                  | 80 (16)               |
| Infections                                           | 43 (9)                |
| Richter syndrome                                     | 27 (5)                |
| Atrial fibrillation                                  | 23 (5)                |
| Second malignancies                                  | 18 (4)                |

**Table S3.** Cause of death in patients treated with ibrutinib ± rituximab.

|                     | <i>n</i> = 494 (%) |
|---------------------|--------------------|
| No of deaths        | 95 (19)            |
| Infection           | 29 (6)             |
| Disease progression | 30 (6)             |
| Richter syndrome    | 24 (5)             |
| Second malignancies | 12 (2)             |
